# Supplementary material for: Study on the site selection evaluation system for township health centers in rural areas under the background of China's New Healthcare Reform
Source: Research Square preprint supplement (doi:10.21203/rs.3.rs-5745663/v1), 2025-01-15
Supplement: Supplementary file 1 [file a374ac00327dbfc744f2e0e3.docx]

## Survey on Medical Treatment Preferences of Residents

Hello, and thank you for taking the time to assist us by completing this questionnaire! To gain a deeper understanding of the current challenges faced by medical and health facilities in Liannan County, we have designed the following survey for residents within Liannan County. This questionnaire is conducted anonymously, and there are no right or wrong answers. Please answer according to your actual situation. The valuable information you provide will be used solely for research purposes and will not be disclosed to the public. Please feel confident in providing your responses.

### Section 1: Basic Information

1. Your Gender

□ Male □ Female

1. Your Age

□ 18 years and under □ 19-30 years □ 31-40 years □ 41-50 years

□ 51-60 years □ 61-70 years □ 71 years and above

1. Your Ethnicity

□ Han □ Yao □ Zhuang □ Other

1. Languages You Use Daily (multiple selections possible)

□ Mandarin □ Cantonese □ Yao □ Hakka □ Other

1. Your Long-term Residence

□ Sanjiang Town □ Zhaigang Town □ Sanpai Town □ Daping Town

□ Xiangping Town □ Woshui Town □ Damai Mountain Town

1. Your Current Living Situation

□ Living alone □ Living with spouse □ Living with spouse and children

□ Shared housing

1. Your Annual Family Income

□ Below 20,000 yuan □ 20,000-50,000 yuan □ 50,000-70,000 yuan

□ Above 70,000 yuan □ Prefer not to disclose

1. Main Sources of Your Family Income (multiple selections possible)

□ Crop income □ Salary income □ Self-employed income □ Property income (e.g., stocks, rental income)

□ Pension □ Financial support from children □ Other

### Section 2: Medical Treatment Behavior Survey

1. Where do you usually go for medical treatment when you feel unwell?

□ People's Hospital □ Township Health Center □ Health Station □ Private Clinic

1. Who usually accompanies you to the hospital for medical treatment?

□ Parents or other guardians □ Spouse □ Children □ Friends □ No one

1. What mode of transportation do you usually use to go to the hospital? (multiple selections possible)

□ Car □ Electric scooter □ Bicycle □ Bus □ Walking

1. What aspects do you pay attention to when choosing a medical institution? (select up to 4)

□ Proximity □ Convenient transportation □ Good service attitude □ Complicated treatment process

□ Medical fees □ Medical level □ Good reputation

1. For chronic diseases such as hypertension and diabetes, how would you choose to seek medical treatment? (select up to 2)

□ Seek medical treatment nearby □ Go to a hospital with good medical technology □ Go to a hospital with a good reputation

□ Wait for the township health center to visit the area □ Buy medicine at a pharmacy □ Do not treat initially

1. For acute diseases such as fever and acute gastroenteritis, how would you choose to seek medical treatment? (select up to 2)

□ Seek medical treatment nearby □ Go to a hospital with good medical technology □ Go to a hospital with a good reputation

□ Wait for the township health center to visit the area □ Buy medicine at a pharmacy □ Do not treat initially

1. Are you satisfied with the health center in your town?

□ Very satisfied □ Satisfied □ Average □ Dissatisfied □ Very dissatisfied

1. What problems do you think currently exist in seeking medical treatment? (select up to 4)

□ Long distance □ Inconvenient transportation □ Poor service attitude □ Complicated treatment process

□ High fees □ Poor medical level □ No obvious problems

1. What treatment methods would you choose when seeking medical treatment? (multiple selections possible)

□ Traditional Chinese medicine □ Western medicine □ Yao medicine

1. Do you experience language barriers when seeking medical treatment?

□ Yes □ No
