# Supplementary material for: Study on the site selection evaluation system for township health centers in rural areas under the background of China's New Healthcare Reform
Source: Research Square preprint supplement (doi:10.21203/rs.3.rs-5745663/v1), 2025-01-15
Supplement: Supplementary file 2 [file d8c50461a7d161934b69f40c.docx]

**Survey on Medical Practice Characteristics**

Hello, thank you for taking the time out of your busy schedule to help us fill out this questionnaire! In order to gain a deep understanding of the difficulties faced by the current healthcare facilities in Liannan County, we have conducted the following questionnaire survey targeting the conditions of medical practitioners. This questionnaire is conducted anonymously, and there are no right or wrong answers to all the questions. You only need to answer according to the actual situation. The valuable information you provide will be used for research purposes only and will never be disclosed, please feel free to answer.

### Section 1. Basic Information

1. Your gender:

□ Male □ Female

1. Your age:

□ 18 years and below □ 19 - 30 years □ 31 - 40 years □ 41 - 50 years □ 51 - 65 years □ 66 years and above

1. Your ethnicity:

□ Han □ Yao □ Zhuang □ Others

1. Languages you use daily (multiple choices):

□ Mandarin □ Cantonese □ Yao language □ Hakka □ Others

1. Your affiliated hospital:

□ County People's Hospital □ Sanjiang Health Center □ Zhaigang Central Health Center

□ Liannan Traditional Chinese Medicine Hospital

□ Sanpai Health Center □ Daping Health Center □ Xiangping Health Center

□ Woshui Health Center □ Dameishan Health Center

1. Your professional category:

□ Medical □ Nursing □ Administration

1. Your working years:

□ 5 years and below □ 6 – 10 years □ 11 – 15 years □ 16 - 20 years □ 21 years and above

### Section 2：Characteristics Survey

1. When villagers get sick, what is the first way they seek to relieve their pain?

□ Solve it by taking medicine themselves □ See a doctor at the village health station

□ See a doctor at the township health center □ See a doctor at the county people's hospital

1. Are you satisfied with the remuneration you receive at your medical workplace?

□ Very satisfied □ Satisfied □ Average □ Unsatisfied □ Very unsatisfied

1. How do you view the social status of medical practitioners?

□ Very high □ High □ Average □ Low □ Very low

1. How long does it usually take for your commute to and from work?

□ 15 minutes or less □ 15 – 30 minutes □ 30 - 45 minutes □ 45 - 60 minutes □ 60 minutes or more

1. Are you satisfied with your current job?

□ Very satisfied □ Satisfied □ Average □ Unsatisfied □ Very unsatisfied

1. Your main practice methods:

□ In-hospital consultation □ Rural consultation □ Home visit □ Online (such as internet, phone) consultation

1. Your treatment methods:

□ Mainly Western medicine □ Mainly Traditional Chinese medicine □ Mainly Yao medicine

□ Combination of Chinese and Western medicine □ Nursing and health care

1. Do you encounter language barriers that cause difficulties in medical treatment?

□ Yes □ No

1. Do you think the medical services provided by the current medical institution match the economic development situation of Liannan County?

□ Medical services are ahead of economic development □ Medical services match the economic situation

□ Medical services lag behind economic development □ Medical services far behind economic development

1. Have you participated in rural consultation projects? (**If no, skip questions 18-21**)

□ Yes □ No

1. How often do you conduct rural consultations on average per month?

□ 1 time □ 2 times □ 3 times □ 4 times □ 5 times or more

1. What do you think are the significances of rural consultation projects? (Choose up to 4)

□ Solve the problem of villagers' difficulty in seeing a doctor □ Popularize medical and health knowledge

□ Establish a good image of the hospital and medical staff □ Improve professional quality

□ Facilitate the development of public health services in the region □ Additional subsidies

□ Enhance doctor-patient relationship □ Others

1. What do you think are the main problems in the implementation of rural consultation projects? (Choose up to 4)

□ Lack of professional talents, difficult to meet demand □ Difficult personnel arrangement

□ Unreasonable scheduling □ Lack of basic equipment and medicine □ Increased workload and pressure

□ Imperfect management and system □ Tense doctor-patient relationship □ Others

1. What is your attitude towards rural consultation projects?

□ Very necessary □ Necessary □ Average □ Not very meaningful □ Not necessary

1. Would you be willing to participate in rural medical outreach activities in the future? (**Mandatory**)

□ Willing □ Unwilling

1. What is the maximum travel time you consider acceptable for making medical visits?

□ 15 minutes or less □ 30 minutes □ 45 minutes □ 60 minutes □ 90 minutes or more
