# Supplementary material for: Study on the site selection evaluation system for township health centers in rural areas under the background of China's New Healthcare Reform
Source: Research Square preprint supplement (doi:10.21203/rs.3.rs-5745663/v1), 2025-01-15
Supplement: Supplementary file 3 [file feb6cd1b696af9b3f58de1de.docx]

**Survey Questionnaire on the Evaluation System for Optimizing the Location Selection of Township Health Centers Based on the Analytic Hierarchy Process**

Dear Expert:

Greetings!

Our research group is currently conducting a study on the optimization of site selection for township health centers. To gain deeper insights into this field, we sincerely invite you to evaluate the weights of various influencing factors in the site selection system and provide your valuable suggestions for further optimizing this evaluation system. Your professional input will greatly contribute to the progress and quality of our research.

Before proceeding with the questionnaire, we kindly ask you to provide some basic personal information for statistical purposes. Please rest assured that all information collected in this questionnaire will be used solely for academic purposes, and your personal information will be kept strictly confidential and will not be disclosed.

We appreciate your cooperation and support in this study. Thank you for your time and contribution!

**Name__________ Gender______ Age______ Position___________Title________________**

**1.Introduction to the Questionnaire Content**

This survey aims to identify site selection criteria for township health centers, forming quantitative standards to serve as a reference for site selection and establishing a theoretical foundation for the location of these centers. The primary purpose of this study is to provide a more scientific basis for the location of newly built or renovated health centers, ensuring they meet the centers' developmental needs while also improving convenience for residents seeking medical care.

Please rate the following evaluation criteria based on their importance in the provided tables. Each criterion to be rated is listed on the left side of the value items, as shown in Fig. 1, where the grey-filled indicators highlight the criteria. Each indicator is scored out of 100 points, with higher scores indicating a greater impact on the site selection of township health centers. Scores of 90–100 points indicate "extremely important," 80–90 points "very important," 70–80 points "fairly important," 60–70 points "important," 50–60 points "slightly important," and below 50 points "not very important" or lower.

**Fig. 1.** Indicator Filling Guide

| Standard Level Score Sub-standard Level Score | Standard Level Score Sub-standard Level Score | Standard Level Score Sub-standard Level Score |
| --- | --- | --- |
| A1 | **B1** | 100 |
| **B2** | 80 |
| **B3** | 92 |

1. **Research Framework Diagram**

**This study uses the Analytic Hierarchy Process (AHP) to summarize the factors influencing location selection. The research framework diagram is shown below.**

**
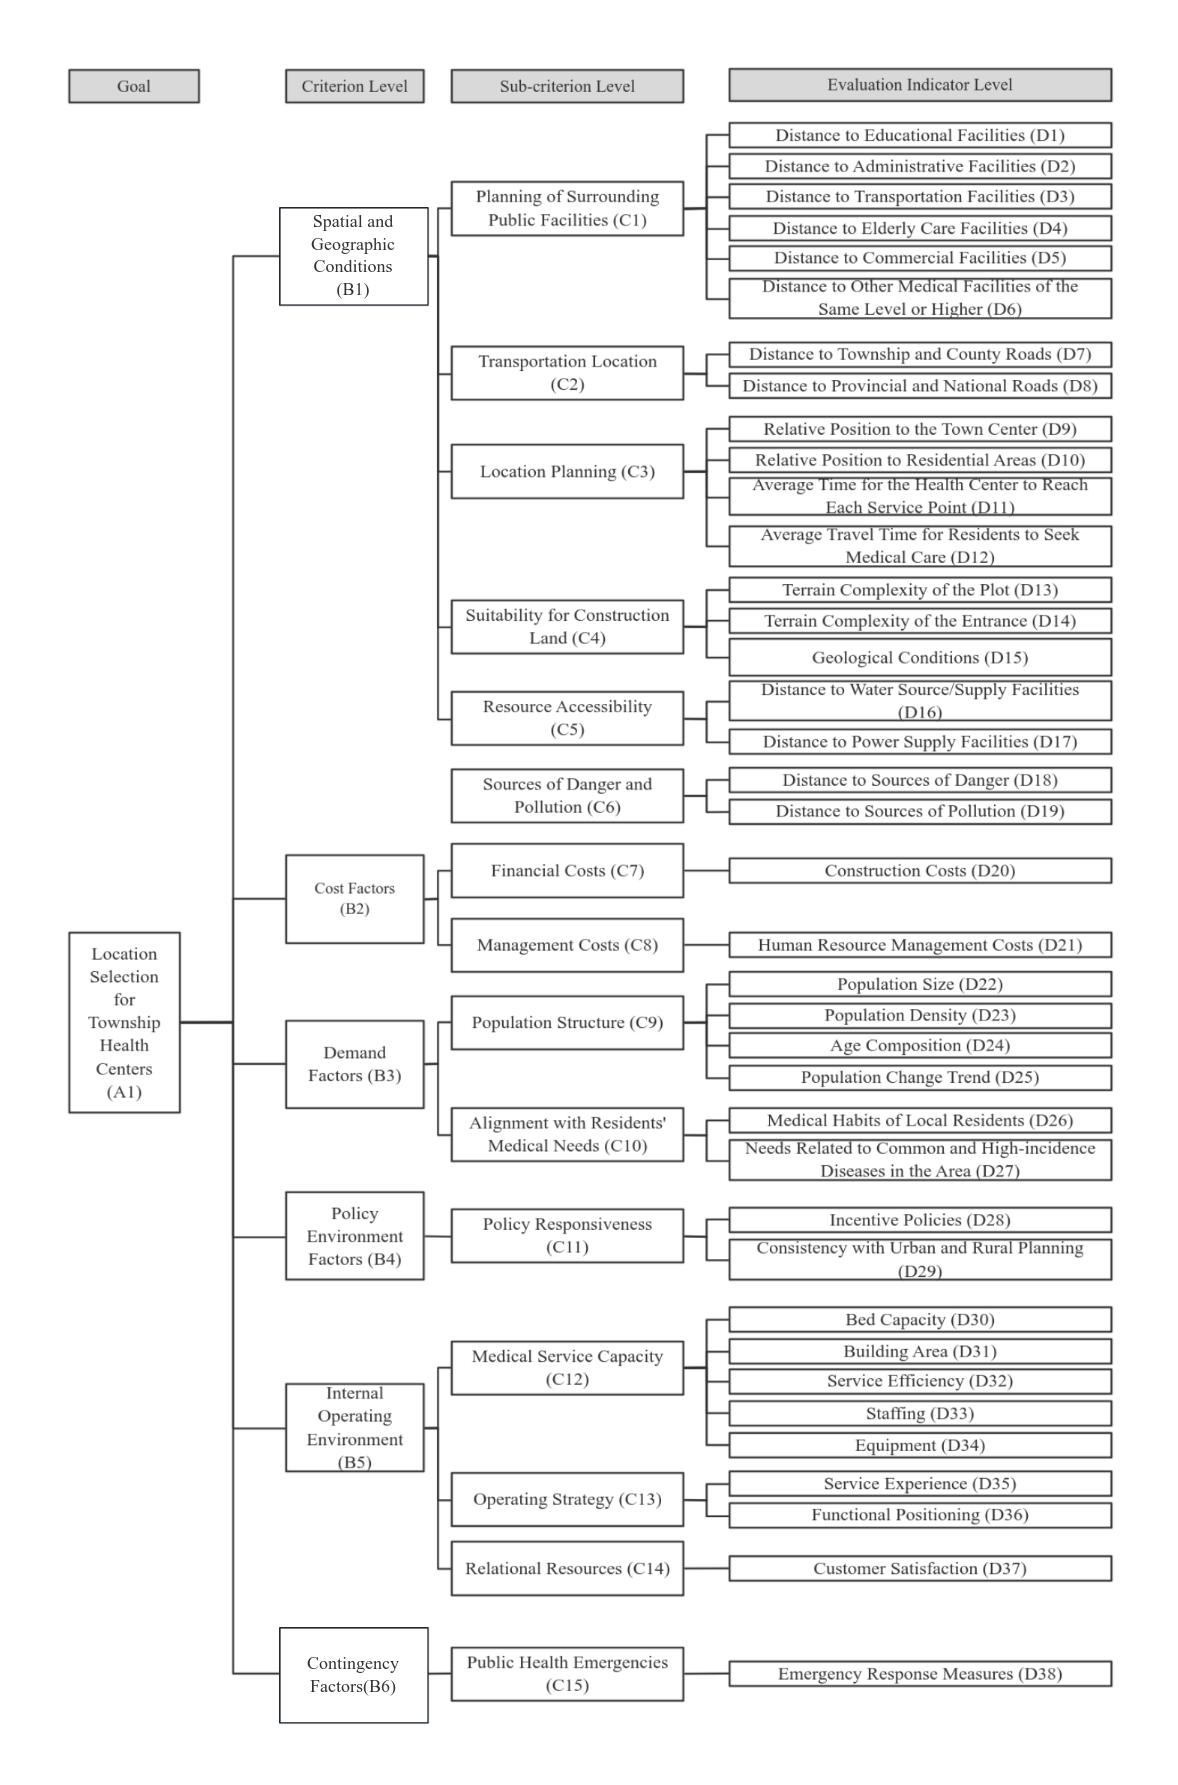
**

1. **Questionnaire Survey Section**

①Factor Level

**Fig. 2.** Evaluation Table of Standards and Sub-standards for the Location Selection of Township Health Centers

| Standard Level Score Sub-standard Level Score | Standard Level Score Sub-standard Level Score | Standard Level Score Sub-standard Level Score | Standard Level Score Sub-standard Level Score |
| --- | --- | --- | --- |
| Location and Geographic Conditions |  | Planning of Surrounding Public Facilities |  |
| Transportation Location |  |
| Location Planning |  |
| Suitability for Construction Land |  |
| Resource Accessibility |  |
| Sources of Danger and Pollution |  |
| Cost Factors |  | Financial Costs |  |
| Management Costs |  |
| Demand Factors |  | Population Structure |  |
| Alignment with Residents' Medical Needs |  |
| Policy Environment Factors |  | Policy Responsiveness |  |
| Internal Operating Environment |  | Medical Service Capacity |  |
| Operating Strategy |  |
| Relational Resources |  |
| Factors |  | Public Health Emergencies |  |

②Indicator Level

**Fig. 3.** Scoring Table of Location Selection Indicators for Township Health Centers①

|  | Sub-standard Level | Evaluation Indicator | Score |
| --- | --- | --- | --- |
| Spatial and Geographic Conditions | Planning of Surrounding Public Facilities | Distance to Educational Facilities |  |
| Distance to Administrative Facilities |  |
| Distance to Transportation Facilities |  |
| Distance to Elderly Care Facilities |  |
| Distance to Commercial Facilities |  |
| Distance to Other Medical Facilities of the Same Level or Higher |  |
| Transportation Location | Distance to Township Roads |  |
| Distance to Provincial Roads |  |
| Suitability for Construction Land | Terrain Complexity of Plot* |  |
| Terrain Complexity of Entrance |  |
| Geological Conditions |  |
| Location Planning | Relative Position to Town Center |  |
| Relative Position to Residential Areas |  |
| Average Time for the Health Center to Reach Each Service Point |  |
| Average Travel Time for Residents to Seek Medical Care |  |
| Resource Accessibility | Distance to Water Source/Supply Facilities |  |
| Distance to Power Supply Facilities |  |
| Sources of Danger and Pollution | Distance to Sources of Danger |  |
| Distance to Sources of Pollution |  |

（Terrain Complexity: Refers to the combination of three terrain factors—elevation, slope, and "surface fragmentation"—to determine the terrain complexity, which serves as a fundamental indicator for evaluating the suitability of construction land.）

**Fig. 4.** Scoring Table of Location Selection Indicators for Township Health Centers②

| Standard Level | Sub-standard Level | Evaluation Indicator | Score |
| --- | --- | --- | --- |
| Cost Factors | Financial Costs | Construction Costs |  |
| Management Costs | Human Resource Management Costs |  |
| Policy Environment Factors | Policy Responsiveness | Incentive Policies |  |
| Incentive Policies |  |
| Demand Factors | Population Structure | Population Size |  |
| Population Density |  |
| Age Composition |  |
| Population Change Trend |  |
| Alignment with Residents' Medical Needs | Medical Habits of Local Residents |  |
| Needs Related to Common and High-incidence Diseases in the Area |  |
| Internal Operating Environment | Medical Service Capacity | Bed Capacity |  |
| Building Area |  |
| Service Efficiency |  |
| Staffing |  |
| Equipment |  |
| Operating Strategy | Service Experience |  |
| Functional Positioning |  |
| Relational Resources | Customer Satisfaction |  |
| Contingency Factors | Public Health Emergencies | Emergency Response Measures |  |

③**Other**

**Fig. 5.** Additional Opinions and Suggestions

| Do you think the factors considered in the location selection of township health centers are reasonable? Are there any other factors that should be considered? Please provide your valuable suggestions. |
| --- |

This survey is now concluded. Thank you sincerely for your cooperation, and we deeply appreciate your valuable professional suggestions!
